# Supplementary material
Source: PubMed Central journal article supplement (PMC7394143)
Supplement: skaa229_suppl_supplementary_figures.pdf [file skaa229_suppl_supplementary_figures.pdf]

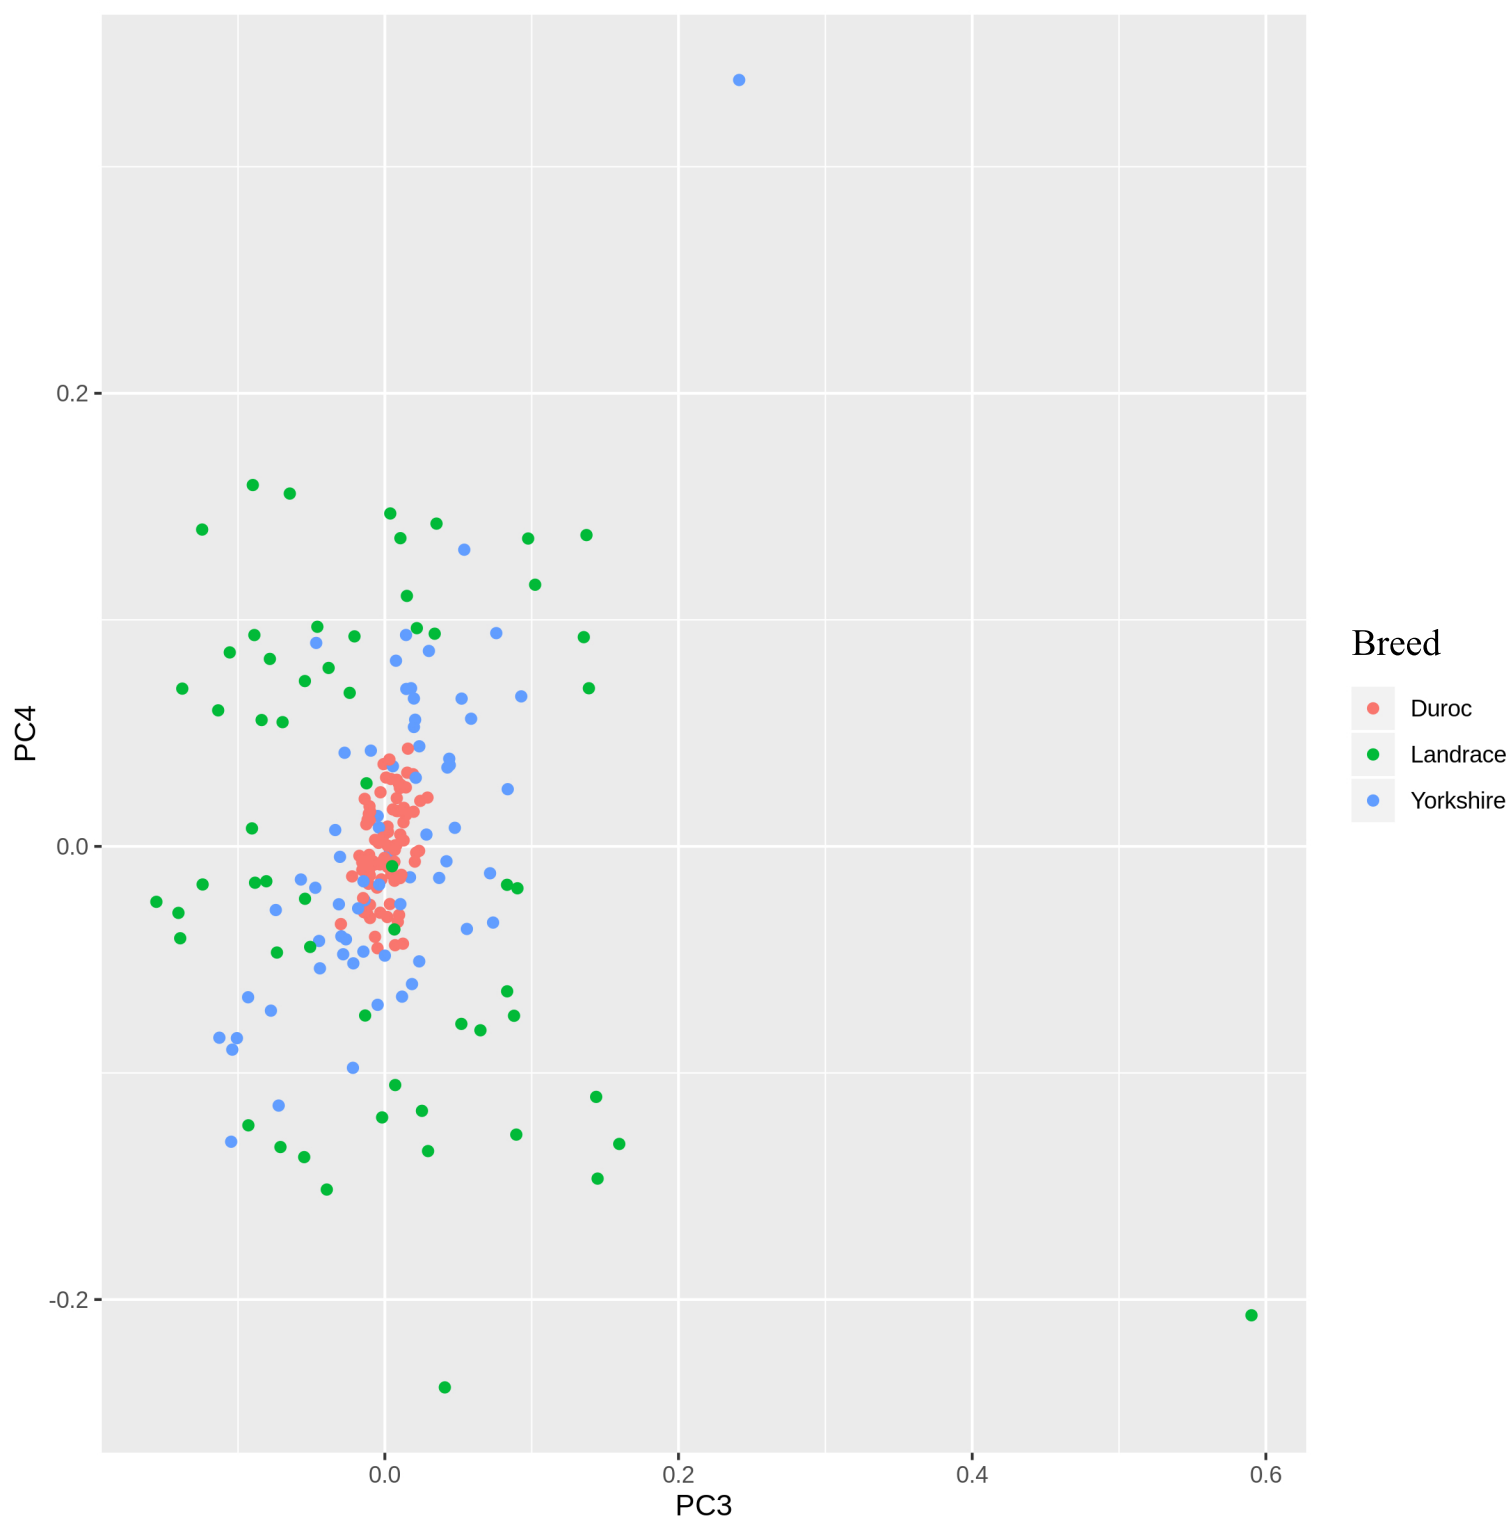

Figure S1. PCA plot of three breeds, indicating genetic variation along the second and third eigenvectors. The dots indicate Duroc (salmon), Yorkshire (blue), and Landrace (green).

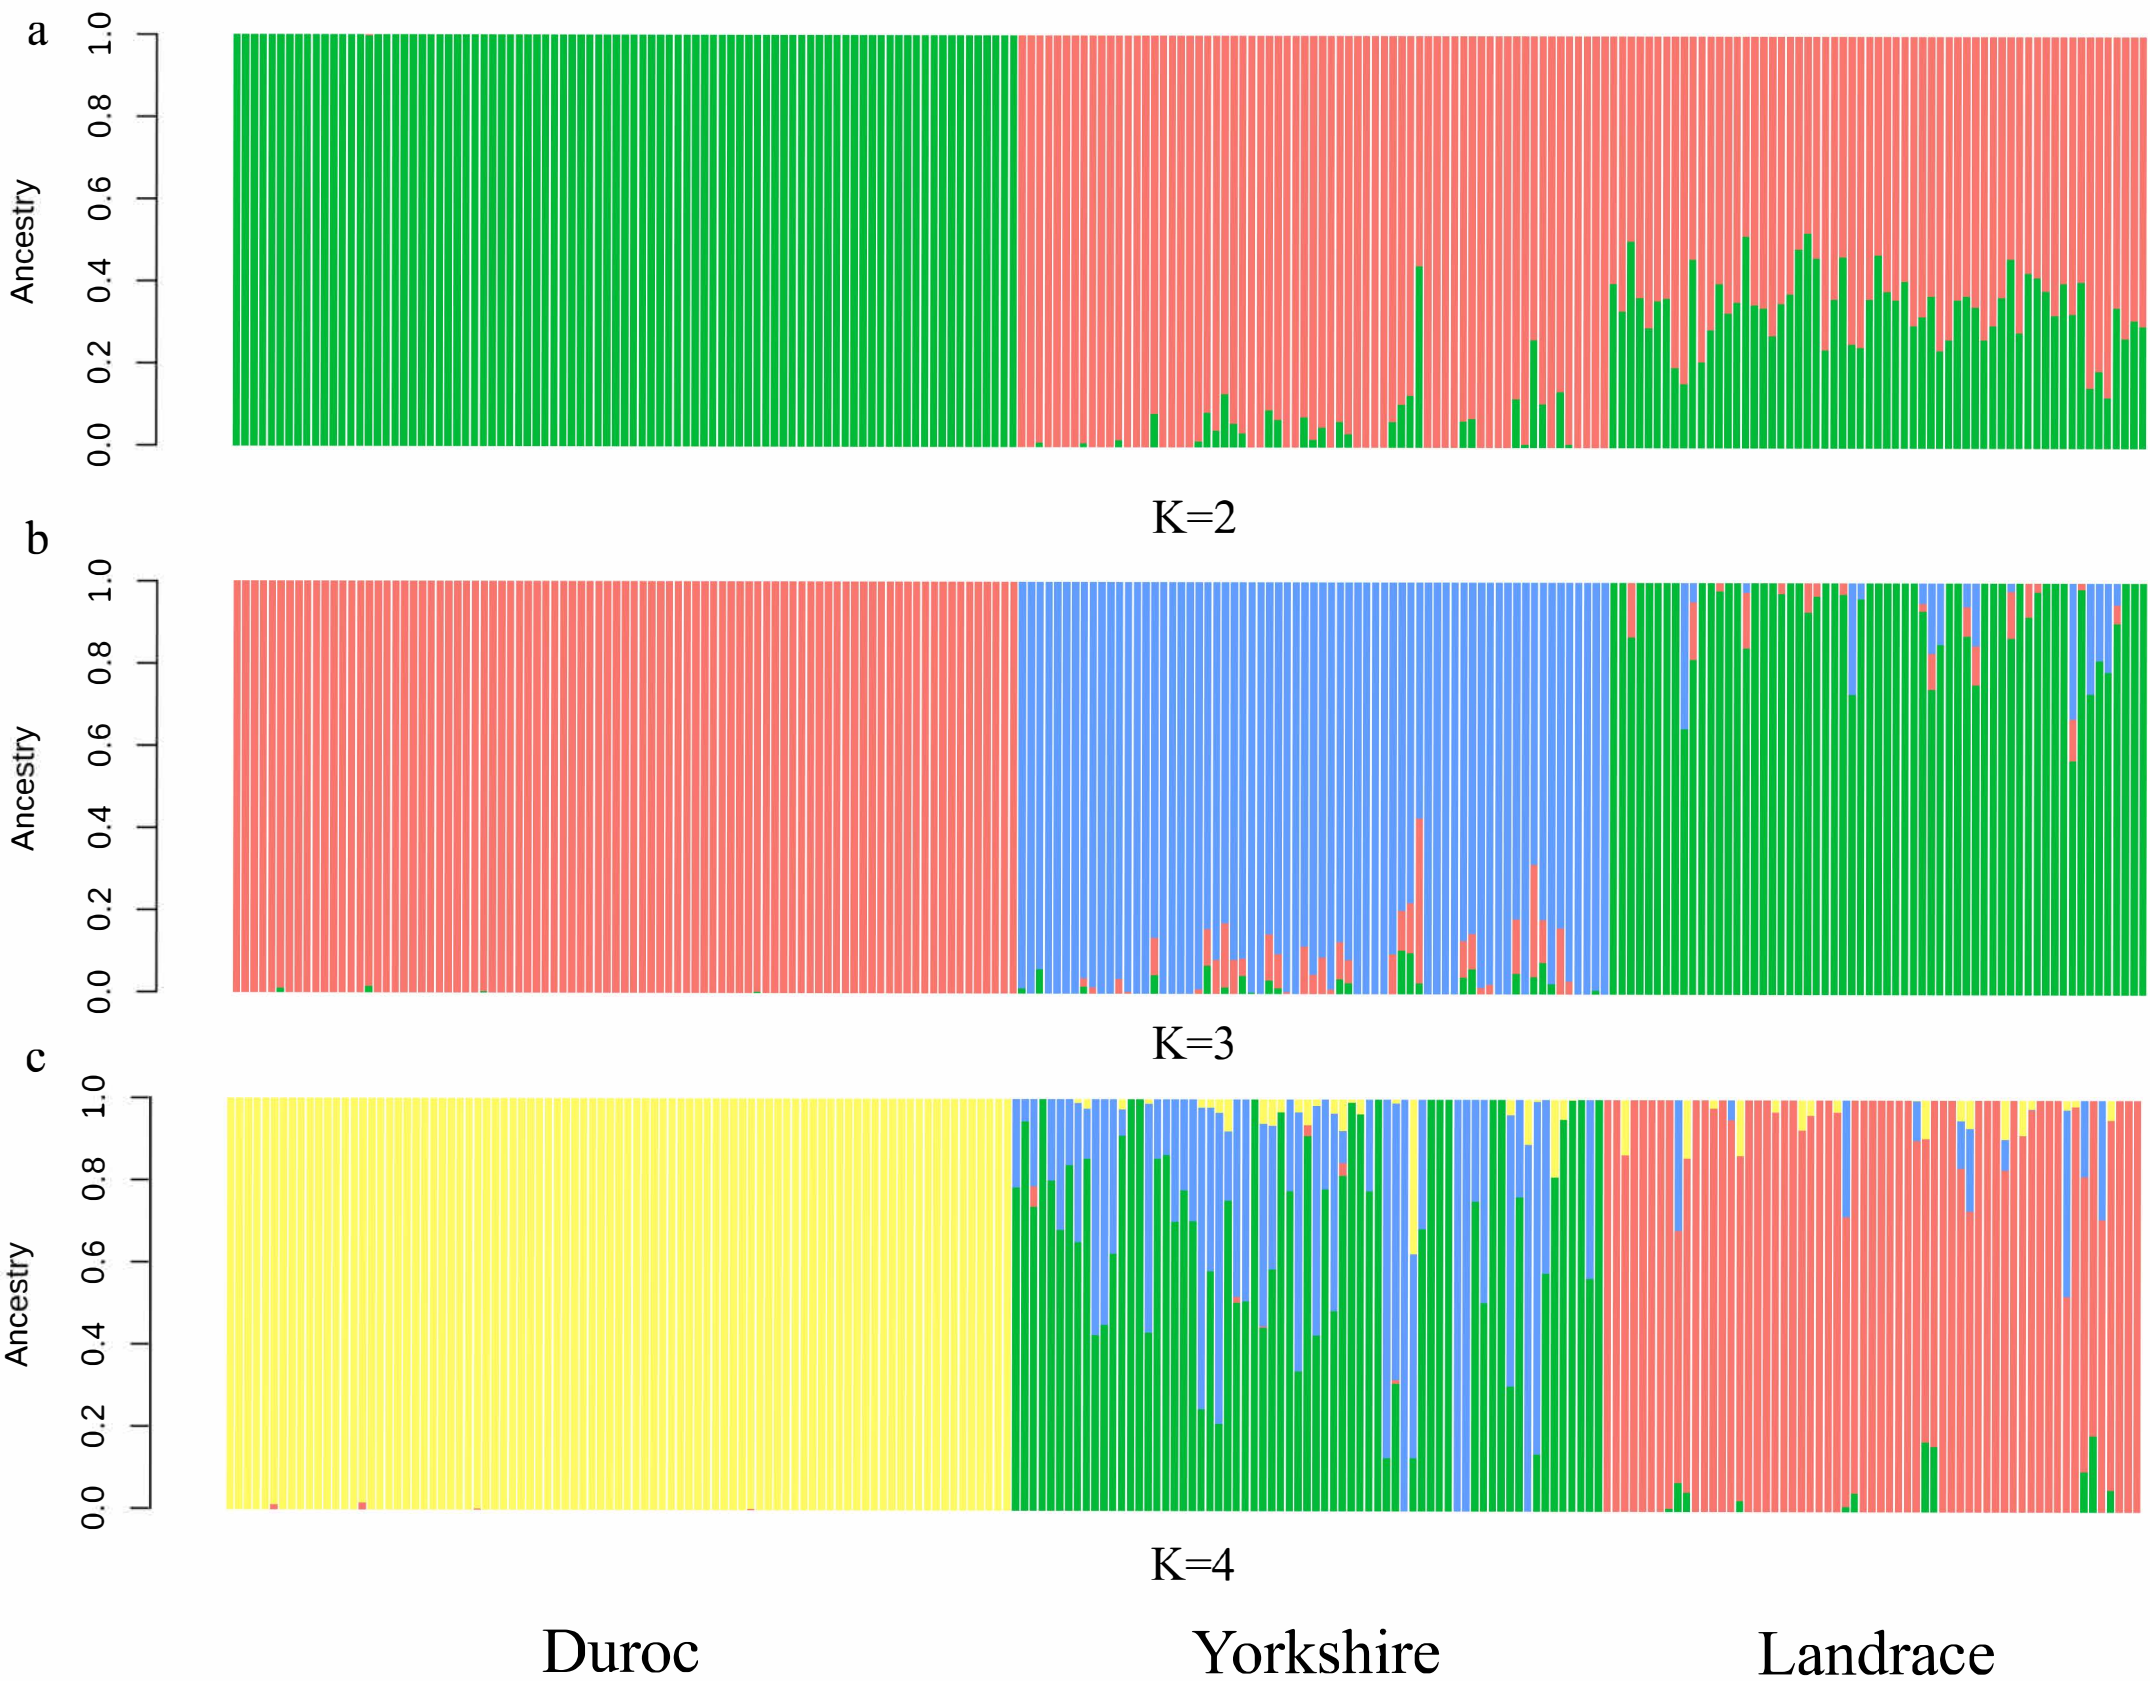

Figure S 2. Population assignment proportions per individual based on results from ADMIXTURE analysis. In the plot, each vertical bar represents a single individual and the different colors reflect the genetic contribution from each of the three components.(a) the analysis with  $K=2$ . (b) the analysis with  $K=3$ . (c) the analysis with  $K=4$ .
